# Supplementary material for: Targetable Signaling Pathway Mutations Are Associated with Malignant Phenotype in IDH -Mutant Gliomas
Source: Oxford University Press journal article supplement (doi:10.1158/1078-0432.ccr-13-3052), 2014-04-09
Supplement: 10780432ccr133052-sup-tab2.xls [file 10780432ccr133052-sup-tab2.xls]

## Sheet: Sheet1
Appendix Table A2. Primers used for sequencing
Gene Symbol	Coding Exon Number	Forward primer sequence	Reverse primer sequence
IDH1	1	M13-CCTAAGTAGCTGGGACTTCACG	AAACCGCGTGTGAAACATAAC
IDH1	2	CAATTTCATACCTTGCTTAATGGG	M13-TGAGCTCTATATGCCATCACTGC
IDH1	3	TTCATGCCACAGGAAGGTATG	M13-TGCCCTATTTGTCTAGGTGTCTTC
IDH1	4	CCCAGAATCATAGGGATAGGG	M13-TGGAAACCTGTCTGGGACTTC
IDH1	5	AGCTGTCAGGTAAGACGGTGG	M13-TCTTGTGTGTCCGGTCTTCTG
IDH1	6	M13-CCAAGGGAACACATCTGGG	GAACCCTCCATCAAGGAGTAGG
IDH1	7	M13-AATTTATATAATTCCAGAAAGCACCG	GGGAACTATGAGACATTTGGAAAC
IDH1	8	M13-AAAGTCCCTTGCCATGTTCAC	TACTGCCGGTTGCCTAGAGAG
PIK3CA	1	M13-TCTGCTTTGGGACAACCATAC	CAACAGTTAAGCTTTATGGTTATTTGC
PIK3CA	1	M13-GCCTCCGTGAGGCTACATTA	GCAATTTAGAGCAAAGGCAGC
PIK3CA	2	M13-AAATCTACAGAGTTCCCTGTTTGC	TCAGTATAAGCAGTCCCTGCC
PIK3CA	3	M13-TGAATACTTGTTGAAATTTCTCCCT	GCAGAGCCTGCAGTGAGC
PIK3CA	4	TGATTGATCTTGTGCTTCAACG	M13-CGGAGATTTGGATGTTCTCCT
PIK3CA	5	TTAGTGGATGAAGGCAGCAAC	M13-CAAACTCCGACTTCGTGATCC
PIK3CA	6	M13-TTGGTTGATCTTTGTCTTCGTG	ATGAACCAAAGCAAGCATGAG
PIK3CA	8	GATTTGCTGAACCCTATTGGTG	M13-ATGAATGAAGGCAAGCTAGGG
PIK3CA	9	TCAGCAGTTACTATTCTGTGACTGG	M13-TGCTGAGATCAGCCAAATTCA
PIK3CA	10	M13-AAAGCTAGTAATGTAAGAAGTTTGGGA	GGGAAAGATAGTTGTGAATGAGC
PIK3CA	14	TCTGAGTGTTGCTGCTCTGTG	M13-TTTGAGGGTAGGAGAATGAGAGA
PIK3CA	16	M13-CATGTGATGGCGTGATCC	GGTGACACTCCAGAGGCAGTAG
PIK3CA	17	M13-GGAAAGGCAGTAAAGGTCATGC	GAGGAATACACAAACACCGACAG
PIK3CA	18	M13-TAAATGGAAACTTGCACCCTG	AAACAAATGGCACACGTTCTC
PIK3CA	19	TGGTGAAAGACGATGGACAAG	M13-TACCCAGGCTGGTTTCAATTC
PIK3CA	20	M13-GACATTTGAGCAAAGACCTGAAG	TGGATTGTGCAATTCCTATGC
TP53	1	AGCCCAACCCTTGTCCTTAC	M13-AGGGTTGGAAGTGTCTCATGC
TP53	2	AAATCATCCATTGCTTGGGAC	M13-CAGTCAGATCCTAGCGTCGAG
TP53	3	M13-GAGGAATCCCAAAGTTCCAAAC	ACGTTCTGGTAAGGACAAGGG
TP53	4	M13-GGGCCAGACCTAAGAGCAATC	AAGCTCCTGAGGTGTAGACGC
TP53	5	AGGCCCTTAGCCTCTGTAAGC	M13-CTGCTCAGATAGCGATGGTG
TP53	6	M13-AGAAATCGGTAAGAGGTGGGC	CATCCTGGCTAACGGTGAAAC
TP53	7	M13-TTGGGCAGTGCTAGGAAAGAG	GTTGGGAGTAGATGGAGCCTG
TP53	8	TTGTCTTTGAGGCATCACTGC	M13-GGAGCACTAAGCGAGGTAAGC
TP53	9	M13-AGCTGCCTTTGACCATGAAG	ATTGCACCATTGCACTCCC
TP53	10	ATTGCAAGCAAGGGTTCAAAG	M13-CCATCTTGATTTGAATTCCCG
CIC	2	M13-GGGCTACCTCATCTAGGGTGG	GGGACACAGAGGTAGATCAGAGG
CIC	3	M13-CCAACCAGAGCAAAGGTGAG	GACATGATGGAGAGGAAGCTG
CIC	4	M13-ATGATGATGCGTGAGTTCCC	TCTCCCGCTGCATTAAACAC
CIC	5	M13-ACTTTATCCCTGCCTGTCCTG	CTTGTTGCACCACTTCCAATC
CIC	6	GCTCCTCCCAGCTTCTTCTG	M13-TTTGCAGACTACAGCTTATATTCCC
CIC	7	AGCCTGCTTCTGCCTAGTACC	M13-TAGGTGGCAGAGAGGGTTCAG
CIC	8	AGGAACTGACGCAGGTCTAGG	M13-GGCCACATGCAACCATAAAC
CIC	9	M13-TGAGGAGTAGCCTTCCTGGAC	CCTGACTATGACCCAACTCCC
CIC	10a	GGGAGTTGGGTCATAGTCAGG	M13-CCAGTGTCTGCAGGATGTTTC
CIC	10b	GGATCCTCCTGTAGCCTTTGG	M13-CCTGCTGTGTCATTTGGAGAC
CIC	10c	M13-CCAAACAAGGAGGAGCAAGAG	GCAGGATGTACTGTACCTGGG
CIC	10d	TGTCACTAACCTACTGGTGGGC	M13-GGCTGGAAGTTAAGAGGCAAG
CIC	11	M13-CCATCCTGCAGTCTGTACCC	GATGGCAAGACAGAGAACCAG
CIC	12	M13-GTCCCACTTGAGGTCTTGGTC	CTGCACATAGGTGATTCTGCC
CIC	13	M13-CATACTCAGAGGCCAGGGAAG	TGGCCTGCTGAAAGACAGAG
CIC	14	M13-GTAGCTCTAGGCTTCACCTCG	AAATTGTTTGCTGAGCCAGG
CIC	15	M13-ACCCAGAGCAGAGTGAGTTGG	GAGACACACAGGCATGGAAAG
CIC	16	M13-AACTCTTTGTTTCTGGCCTTTG	AGTCCACTTCTGACAGGACCC
CIC	17	M13-TCTGTGGACAAGTGAGCATGG	TGGCCAAACAGAAGCAGACTC
CIC	18	M13-AGGAAGAACTCCACGGGTAGG	CTCTAACCGCCTTCCAGAGAC
CIC	19	CTAGGTTGCCCTGTGACTGTG	M13-CCTTGGAGGGAAAGATGTCTG
CIC	20	CATGCAGCTCTTTCAGGACC	M13-GAGGAGATAACCTTCCTGCCC
PIK3R1	1	M13-TGTCCTCTGCTGGACACATAA	GCCCAGAACATAACGACTCAA
PIK3R1	2	M13-ACCCTAGGTGAGAAGCAGTGG	GCAGAGTATCTGGACATAGCTGG
PIK3R1	3	M13-AACTGGAATGTCTCTGGCAGC	TTACCATAACAGGGCAGGGAG
PIK3R1	4	ACGGCTAACGAATACTTTGTGTC	M13-GTCTTCTCTTGGATGCTTGGG
PIK3R1	5	TGACTCCTATAGCTTGAAGAAAGAGC	M13-TGCACATGCATCTCTGGAGTAG
PIK3R1	6	M13-TGCAGATGCTATCACACACATTC	TCCACAAATGTTGAAACTCGG
PIK3R1	7	CCATATTGCATGGAATTGTGAAC	M13-AATGGAACTTAGCAAGCTGGTG
PIK3R1	8	TTAAATCTATGTGGGCAGGAGG	M13-GAAGCCATATTTCCCATCTCG
PIK3R1	9	M13-GGTAAGCCAGGGAATATAGCTG	TGCAATTATGTAATTACGAGTGTCAAG
PIK3R1	10	M13-TTAAAGATGTTTCCATGTCAGCTATT	TTGAAACTCAGTGACTGCTTCAG
PIK3R1	11	M13-CAAATGTCCTGGTAGTGTCTTGC	TCCACGTGATCATTCAAAGC
PIK3R1	12	M13-GAAGAGAAGCCACGCTTTACC	AAGAGAACGCATTAACTCATCCTG
PIK3R1	13	M13-TCCAGCTGAGAAAGACGAGAG	TTCAGGGACATCATTATGGACAC
PIK3R1	14	M13-GGTATGCCTAGGGAAGACAGC	GGAATCCAAACCTAGTCTTCCAAC
PIK3R1	15	GTTACCTACCCAAGGCACTCG	M13-AGATCAGACTGGAGAGGAGCC
		M13 Tag: gtaaaacgacggccagt
